# Supplementary material for: miRNA and mRNA expression analysis reveals potential sex-biased miRNA expression
Source: PubMed Central journal article supplement (PMC5206641; doi:10.1038/srep39812), 2017-01-03

**miRNA and mRNA expression analysis reveals potential sex-biased  
miRNA expression**

Li Guo, Qiang Zhang, Xiao Ma, Jun Wang, Tingming Liang

**Table S1: Statistical analysis based on the data in Figure 6.**

| miR-143            | Log <sub>2</sub> (FC) | <i>t</i> | <i>P</i> | miR-375             | Log <sub>2</sub> (FC) | <i>t</i> | <i>P</i> |
|--------------------|-----------------------|----------|----------|---------------------|-----------------------|----------|----------|
| Luad-all (n=41)    | -1.36                 | -16.5429 | 0.0001   | Luad-all (n=41)     | 2.56                  | 3.1227   | 0.0033   |
| Ucec-female (n=18) | -2.35                 | -6.4633  | 0.0001   | Ucec- female (n=18) | 3.11                  | 2.0372   | 0.0575   |
| Prad-male (n=53)   | -0.54                 | -9.7859  | 0.0001   | Prad-male (n=53)    | 1.92                  | 10.2413  | 0.0001   |
| Luad-male (n=21)   | -1.49                 | -11.3897 | 0.0001   | Luad-male (n=21)    | 2.69                  | 2.3472   | 0.0293   |
| Luad-female (n=20) | -1.27                 | -12.0082 | 0.0001   | Luad-female (n=20)  | 2.31                  | 2.6060   | 0.0174   |

**Table S2: Functional analysis based on deregulated miRNAs and mRNAs.**

| <b>Pathway</b>                   | <b>P-value</b> |
|----------------------------------|----------------|
| Regulation of actin cytoskeleton | 9.86E-06       |
| Wnt signaling pathway            | 9.10E-07       |
| Melanogenesis                    | 6.84E-08       |
| MAPK signaling pathway           | 3.54E-04       |
| Tight junction                   | 7.18E-06       |
| Focal adhesion                   | 6.74E-04       |
| Axon guidance                    | 8.21E-05       |
| Calcium signaling pathway        | 0.003555       |
| Alzheimer's disease              | 0.003096       |
| Purine metabolism                | 0.001786       |

The table only lists the top 10 enriched pathways.

**Table S3: Selected paired tumor and normal samples in the three diseases.**

| <b>Diseases</b> | <b>Tumor</b> | <b>Normal</b> | <b>Total</b> |
|-----------------|--------------|---------------|--------------|
| LUAD            | 41           | 41            | 82           |
| UCEC            | 18           | 18            | 36           |
| PRAD            | 53           | 53            | 106          |
| LUAD-male       | 21           | 21            | 42           |
| LUAD-female     | 20           | 20            | 40           |

**A**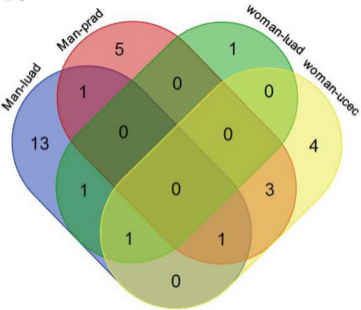**Figure S1****miRNA****B**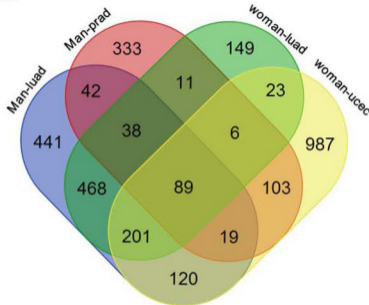**mRNA**

Figure S2

## TCGA database: mRNA and miRNA sequencing data

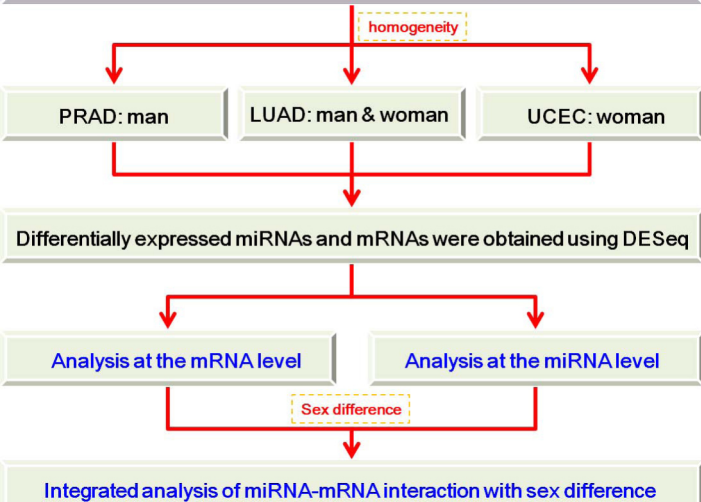

Supplement: srep39812-s1.pdf [file srep39812-s1.pdf]
